# Supplementary material for: Amino-functionalized metal–organic framework for adsorption and separation of dichloromethane and trichloromethane
Source: Royal Society of Chemistry journal article supplement (doi:10.1039/c6ra07637h), 2016-01-01
Supplement: c6ra07637h1.pdf [file c6ra07637h1.pdf]

## Supplementary Material

Amino-functionalized metal-organic framework for adsorption  
and separation of dichloromethane and trichloromethane

*Fengming Tian, Xinghua Zhang, and Yunlin Chen\**

Institute of Applied Micro-Nano Materials, School of Science, Beijing Jiaotong  
University, Beijing 100044, People's Republic of China

\*Corresponding Author Tel./Fax: +86-10-51688483-18.

E-mail: [ylchen@bjtu.edu.cn](mailto:ylchen@bjtu.edu.cn)

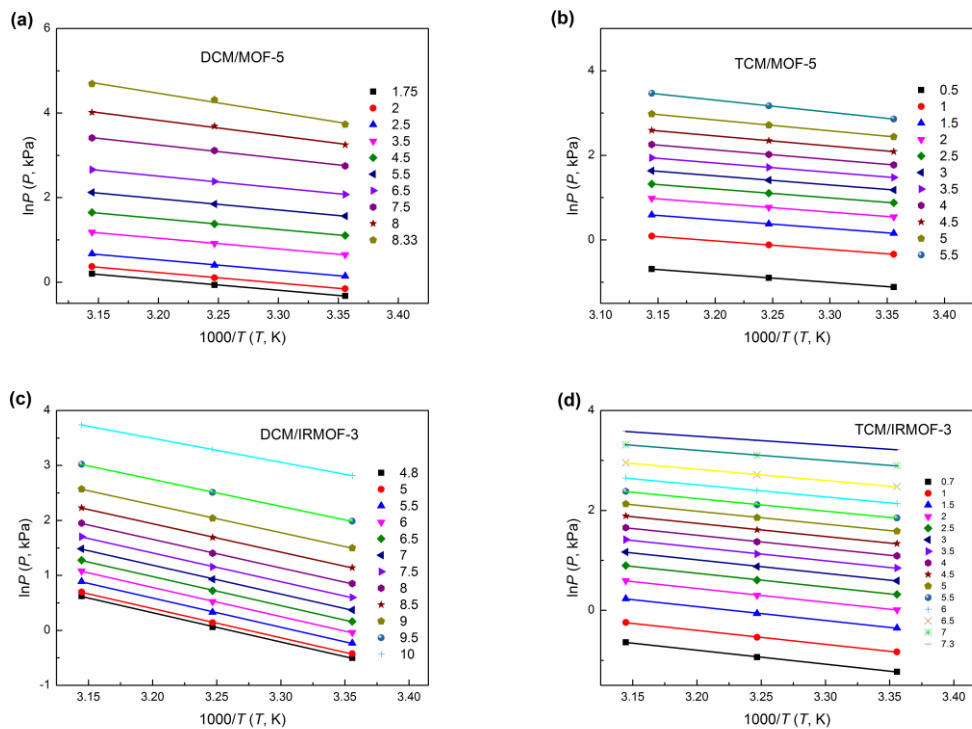

**Fig. S1.**  $\ln P$  versus  $1/T$  for estimation of isosteric adsorption heats of DCM (a) and TCM (b) on the MOF-5 and DCM (c) and TCM (d) on IRMOF-3.

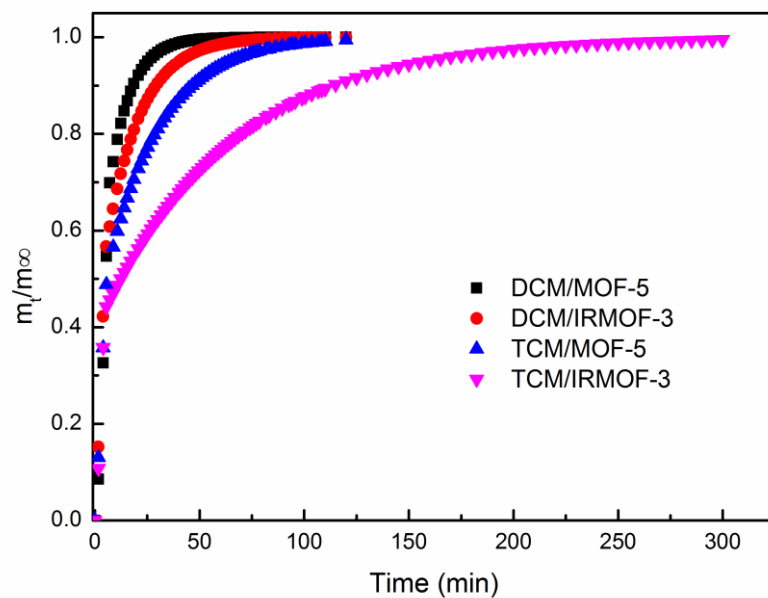

**Fig. S2.** Fractional adsorption uptakes of DCM and TCM on the MOF-5 and IRMOF-3 at 2.8 kPa and 298 K

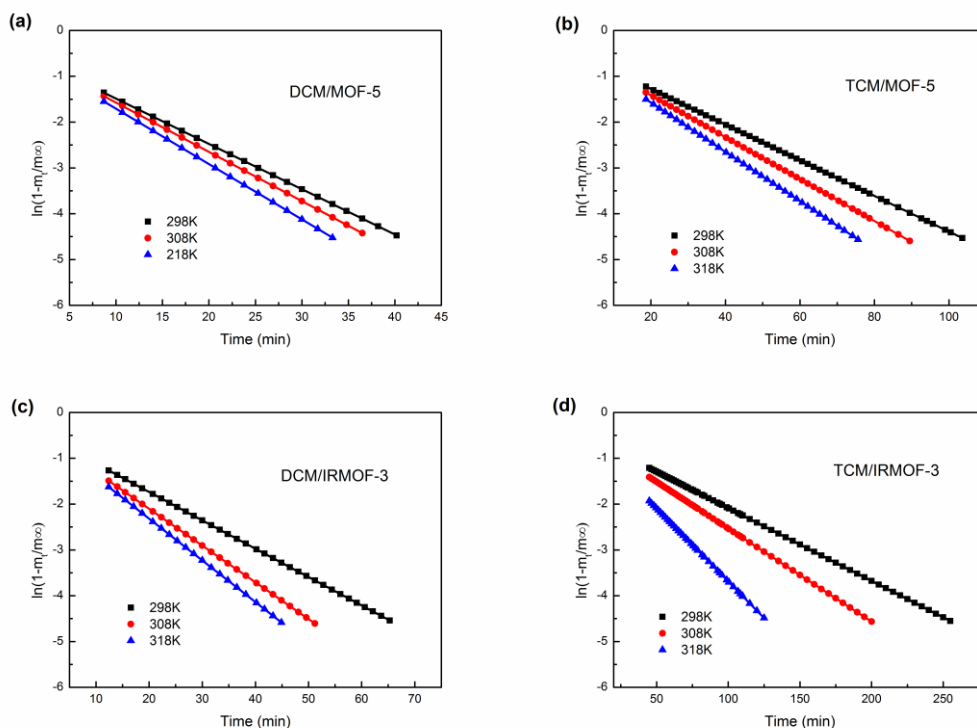

**Fig. S3.** Plots of the fractional DCM adsorption uptakes on MOF-5 (a) and IRMOF-3 (b) and fractional TCM adsorption uptakes on MOF-5 (c) and IRMOF-3 (d) against the adsorption time at different temperatures (298, 308, and 318 K) and at 2.8 kPa.

**Table S1.** Physicochemical properties of chlorinated volatile organic compounds DCM and TCM.

| Cl-VOCs | $\rho$<br>(g/mL, 25 °C) | MW<br>(g/mol) | BP<br>(°C) | SP<br>(kPa, 298 K) | SP<br>(kPa, 308 K) | SP<br>(kPa, 318 K) | $\mu$<br>(Debye) |
|---------|-------------------------|---------------|------------|--------------------|--------------------|--------------------|------------------|
| DCM     | 1.326                   | 84.93         | 39.6       | 59.807             | 83.552             | 121.627            | 1.8              |
| TCM     | 1.484                   | 119.38        | 61.2       | 28.062             | 38.605             | 45.582             | 1.08             |

$\rho$ : Density; MW: Molecule weight; BP: Boiling Point; SP: Saturation pressure;  $\mu$ : dipole moment
